# Supplementary material for: Effects of disease severity distribution on the performance of quantitative diagnostic methods and proposal of a novel ‘V-plot’ methodology to display accuracy values
Source: Open Heart. 2018 Jan 20;5(1):e000663. doi: 10.1136/openhrt-2017-000663 (PMC5786922; doi:10.1136/openhrt-2017-000663)
Supplement: Supplementary file 1 [file openhrt-2017-000663supp001.xlsx]

## Sheet: V-plot display of agreement
Enter Gold Standard values HERE ↓	Enter New Test values HERE ↓	V-plot display: enter data in columns A and B and range criteria in columns D and E The plot below will display the agreement between methods A and B in each quantile of disease severity The overall agreement between the methods in the sample inserted in A can be seen in E22 The overall agreement in other samples can be calculated in Sheet 2
3.63616	3.52164
4.11878	4.34644
4.15094	4.28336
4.19913	3.86062		Select data range for V-plot ↓
4.26941	5.40332
4.27718	4.19128		From >>>>>>>>>>>>>	2
4.32963	4.19488
4.36697	4.88952
4.43917	4.89945		Enter size of each quantile >>>>>>>>>>>
4.46506	3.88442			0.5
4.4977	3.72499
4.49853	5.01232		Enter gold standard cut-off here* >>>>>>>>>
4.52767	4.94412			5.7
4.54019	5.1384		Enter new test cut-off here* >>>>>>>>>
4.55688	4.92037			5.7
4.56272	4.56149
4.56413	4.84182		Sample N
4.57572	5.37381		987
4.58941	4.94603
4.59121	4.64838
4.59173	4.69544		Overall agreement (diagnostic accuracy) between methods in sample inserted in A	0.826748
4.60155	5.20176
4.60281	3.80344
4.60758	4.53831
4.61761	5.02094
4.61901	5.38412
4.62689	4.82072
4.64904	4.45773
4.67257	3.86894
4.70719	4.7322						* Note: The current analysis considers a positive (abnormal) test if result ≥ cut-off. If needed this can be easily changed in sheet "Raw analysis", columns A and B;
4.71489	5.12388
4.71849	5.03952
4.73821	4.86423
4.74578	4.86383
4.7463	5.09733
4.74733	4.89883
4.75423	4.68872
4.75851	4.51651
4.76882	5.51385
4.77701	4.612
4.77857	5.39438
4.78015	4.86885
4.78487	4.56145
4.78549	5.09319
4.79066	4.55194
4.79333	5.05965
4.79602	4.93999
4.80099	4.91593
4.80107	5.04837
4.80108	5.2555
4.81957	6.04463
4.8236	4.74791
4.83195	5.04209
4.84658	4.38574
4.85288	4.6949
4.86409	5.03834
4.86804	5.28601
4.87158	4.97409
4.87227	5.27075
4.87547	4.74523
4.87585	5.00839
4.87765	4.7766
4.88582	5.20924
4.89952	5.94087
4.90046	5.34296
4.90086	4.91402
4.90286	5.01896
4.90523	4.80271
4.91171	4.47682
4.91799	5.10203
4.9295	5.16701
4.93302	4.93257
4.96196	4.19787
4.96376	4.4915
4.96405	5.03461
4.97074	5.24627
4.97284	4.78687
4.98262	4.47742
4.99234	4.82678
4.9938	5.21428
5.00167	4.46509
5.00406	5.33551
5.00604	4.73517
5.00924	4.45956
5.01671	5.0202
5.02212	4.62688
5.02488	4.7371
5.02785	5.34944
5.03068	5.44308
5.0382	4.96692
5.04237	5.42956
5.04346	5.77123
5.04855	5.20128
5.04886	5.08082
5.04895	4.8332
5.05187	4.77025
5.05307	4.5431
5.06011	5.13791
5.06301	4.70668
5.06774	4.67945
5.08477	4.65684
5.08574	4.63475
5.09286	5.38783
5.09822	4.76384
5.10303	5.35425
5.10526	5.95808
5.10646	5.29226
5.11006	5.25141
5.12071	4.868
5.13176	4.95798
5.13674	5.46623
5.13748	4.50454
5.14218	4.5318
5.14779	5.40726
5.14835	5.10168
5.14959	5.29573
5.15659	5.3684
5.15808	4.73442
5.15985	4.58544
5.16126	4.9006
5.16162	5.45431
5.16666	5.07719
5.16766	5.26368
5.17024	5.04072
5.17383	5.46287
5.17438	5.6565
5.18429	5.14679
5.18638	5.68574
5.18779	5.48513
5.19088	4.66103
5.19166	5.26456
5.19366	5.45922
5.19539	5.03145
5.20192	5.82642
5.20774	4.83367
5.2089	5.42026
5.20924	4.76041
5.21086	4.50564
5.21102	5.06065
5.21156	5.68669
5.21338	5.44761
5.2187	4.96061
5.22121	5.26592
5.22497	5.1999
5.22777	5.44566
5.2348	5.29056
5.23586	4.56626
5.23704	5.42519
5.2385	5.25491
5.24079	5.59025
5.24093	5.64868
5.24678	4.92045
5.24941	5.03168
5.25095	5.32912
5.25107	5.31699
5.2535	4.85743
5.25368	5.22363
5.26095	5.32702
5.26329	5.02111
5.26426	4.1927
5.26629	6.3143
5.27097	5.46268
5.27925	5.01247
5.28065	5.33015
5.28498	5.14252
5.28525	5.24705
5.28541	5.05633
5.28775	5.65629
5.29021	4.77987
5.29807	4.93588
5.2993	5.48225
5.30228	5.1491
5.30917	5.73545
5.31062	5.60317
5.31619	5.0225
5.31778	4.77958
5.32147	5.48568
5.32155	5.45915
5.32222	5.16465
5.32258	5.35754
5.32342	5.42651
5.32538	5.68433
5.32557	5.61199
5.32704	5.39217
5.32718	5.72447
5.32794	5.91362
5.32817	5.46273
5.33024	5.92035
5.33077	5.40154
5.33304	5.30355
5.33614	6.12235
5.33917	5.38288
5.34872	5.53339
5.35185	5.43904
5.3527	5.45094
5.35423	5.3114
5.35423	5.36741
5.35543	4.88078
5.35568	5.30089
5.35687	5.44982
5.35783	5.1636
5.362	5.6468
5.3627	4.96887
5.36554	5.28906
5.36961	4.98523
5.37104	5.88988
5.37237	5.74252
5.37502	5.54384
5.37996	5.3948
5.38068	5.51521
5.38219	5.20194
5.38337	5.58959
5.38369	5.85943
5.38462	5.52856
5.38912	5.80669
5.39158	5.36076
5.39444	5.66181
5.39705	5.2298
5.40288	5.56629
5.40517	5.51392
5.40645	5.48072
5.40699	5.39878
5.40885	5.59788
5.41058	5.85688
5.41253	4.95915
5.41411	5.43632
5.4152	5.89448
5.41837	5.11995
5.41873	5.78042
5.41929	5.63367
5.41992	5.59936
5.42014	4.88127
5.42248	5.3786
5.42386	4.92932
5.42533	5.89535
5.4266	5.57458
5.4299	4.63668
5.43182	5.59444
5.43213	5.61862
5.43224	5.60096
5.43506	5.68865
5.43935	5.53142
5.43962	5.22976
5.44006	5.5122
5.44037	5.09735
5.44262	5.31915
5.44535	5.1294
5.44572	4.7704
5.446	4.73067
5.44825	5.34847
5.44916	5.09772
5.44964	5.56291
5.45013	5.57075
5.45089	5.59506
5.45225	5.54395
5.45637	5.16989
5.45778	5.60642
5.45832	5.43393
5.4586	5.14789
5.46043	6.00804
5.46121	5.16117
5.4693	5.81361
5.47113	5.55079
5.47156	6.31934
5.47537	6.41064
5.47538	5.73629
5.47659	5.11026
5.47681	5.1027
5.47684	5.66348
5.4797	6.0324
5.48313	5.36498
5.48343	5.79484
5.4841	5.36713
5.48459	5.49795
5.48494	5.48187
5.48602	5.22911
5.48952	5.39441
5.49174	5.47933
5.49527	5.14652
5.49532	6.22344
5.49669	5.65107
5.49798	5.81992
5.49825	5.93186
5.50072	5.50971
5.50237	5.66904
5.50954	5.77315
5.51161	5.05356
5.51237	5.84766
5.51645	5.72582
5.51659	5.47971
5.51692	5.93953
5.51712	5.84644
5.51925	5.70583
5.51938	5.69969
5.51952	5.52721
5.52272	5.41809
5.52718	5.54694
5.53096	5.32305
5.53249	5.7326
5.53283	5.82552
5.53363	5.15089
5.534	5.29979
5.53657	4.9255
5.53678	5.83775
5.53678	5.35892
5.53769	5.27425
5.53842	5.62092
5.5402	5.93696
5.54076	6.17998
5.54083	5.56872
5.54098	5.61023
5.54377	5.26981
5.54787	5.26885
5.55079	5.87131
5.55162	5.80966
5.55397	6.13627
5.55737	5.92549
5.55752	5.43332
5.5596	5.65884
5.5627	5.63387
5.56389	5.34109
5.56618	5.77749
5.56868	5.69612
5.56874	5.91228
5.5694	5.89723
5.57107	5.33979
5.57474	5.54951
5.57517	5.59587
5.57652	5.55978
5.57676	5.5237
5.57686	5.98421
5.582	5.42599
5.58712	5.23248
5.5875	5.64786
5.58802	5.79446
5.58927	6.0058
5.59308	6.00255
5.59833	6.1186
5.59969	5.88409
5.60034	5.84652
5.60061	5.53041
5.6011	5.67488
5.6031	5.06928
5.60522	5.79292
5.60605	5.91099
5.61293	5.68345
5.61421	5.4582
5.61472	5.6093
5.61521	5.30074
5.6153	5.40458
5.61579	5.56582
5.61979	6.16333
5.62238	5.17783
5.62308	5.97714
5.62531	5.05712
5.62613	5.50824
5.63052	5.48518
5.63089	5.68476
5.63153	5.90641
5.63271	5.24499
5.63769	5.19644
5.64132	5.58146
5.64195	5.71463
5.64307	5.45877
5.64347	5.64651
5.64529	5.91998
5.64602	5.69387
5.6471	6.11004
5.64835	5.63519
5.64853	5.91325
5.65181	5.46503
5.6527	5.31123
5.65298	5.95289
5.65333	5.43935
5.65559	6.04474
5.65698	5.01811
5.65708	5.18723
5.65917	5.29494
5.66199	5.48129
5.6627	5.39182
5.6643	5.19255
5.66737	5.77095
5.66741	6.22197
5.66932	5.24607
5.66936	6.04448
5.67017	5.88558
5.67106	5.81846
5.67494	5.84484
5.67601	5.60107
5.67738	4.93822
5.67753	5.66504
5.67813	5.42652
5.67897	5.72097
5.68038	5.55438
5.68388	5.38768
5.68693	5.16088
5.68932	6.05796
5.69078	5.66194
5.69416	5.0446
5.69445	5.43487
5.69533	6.03641
5.69562	6.37434
5.69922	5.84206
5.69952	5.3192
5.69965	5.62226
5.70075	6.17781
5.70088	5.661
5.70136	6.11676
5.70242	5.72379
5.70317	5.62626
5.70616	5.88179
5.70735	5.63452
5.7078	6.28862
5.70838	5.65332
5.71057	5.43295
5.71188	5.53553
5.71198	5.59987
5.71345	5.44376
5.71611	5.11909
5.71617	6.08339
5.71682	5.51439
5.71703	5.87832
5.71828	5.73936
5.72068	5.89451
5.72331	6.0743
5.7235	5.24959
5.72451	5.09981
5.72481	5.3199
5.72635	5.5059
5.73246	5.99551
5.73639	6.0081
5.73893	5.90347
5.74037	5.32995
5.74098	5.83325
5.74178	5.63623
5.74237	5.65601
5.74405	5.627
5.74505	5.69005
5.74701	5.86455
5.74728	5.3577
5.74898	5.53292
5.74933	6.15858
5.7494	5.22873
5.74986	5.52059
5.75198	5.78607
5.75487	6.29249
5.75523	5.78627
5.75532	5.75453
5.75585	5.77827
5.75622	6.33254
5.75632	5.59192
5.75691	5.84434
5.75714	5.45607
5.76101	6.49981
5.76164	5.92061
5.76165	5.85584
5.76444	6.70125
5.76472	5.65575
5.76711	5.607
5.7683	5.92883
5.76877	5.28355
5.76993	5.94855
5.77003	5.31626
5.77361	6.00675
5.77399	6.04473
5.77723	5.11083
5.77898	6.06783
5.77965	6.04897
5.7803	5.77802
5.78307	5.67252
5.78404	5.6805
5.78428	5.74217
5.78439	5.79648
5.78545	5.51568
5.78678	5.84413
5.78776	5.88109
5.78782	5.98872
5.78796	5.77767
5.79169	5.76499
5.79513	5.80121
5.79659	5.74557
5.79836	6.15762
5.80017	5.96558
5.80038	5.94312
5.80425	5.35362
5.80733	5.79833
5.80764	6.01627
5.81292	5.513
5.81346	5.64033
5.81373	5.91504
5.81487	5.69538
5.8198	6.34768
5.82162	5.85134
5.82355	6.0705
5.82906	5.50767
5.82931	6.2937
5.83328	5.74063
5.83482	6.20822
5.83739	5.7168
5.83968	5.97048
5.84069	5.40376
5.84084	5.48227
5.84137	5.30618
5.84289	5.58607
5.84344	5.98096
5.84428	6.03168
5.84669	5.4155
5.84847	5.56527
5.84983	6.33466
5.85188	6.28138
5.85245	6.42548
5.85284	6.05916
5.85479	6.03578
5.85852	5.39496
5.85922	5.96998
5.86147	5.48743
5.86177	5.86035
5.86216	5.79508
5.86371	5.88108
5.86677	5.45137
5.86689	5.95491
5.87005	5.75364
5.87378	6.0447
5.87725	5.22994
5.87859	5.8513
5.87906	5.72915
5.88044	6.075
5.88128	5.95766
5.8826	5.49297
5.88436	5.30887
5.88516	5.7569
5.88525	6.41103
5.88556	5.695
5.88612	6.25762
5.88815	5.64921
5.88909	5.74453
5.88949	6.1125
5.88964	6.03798
5.89053	5.8615
5.89104	6.75702
5.89178	5.6541
5.89418	5.77878
5.89546	6.12772
5.89933	5.48723
5.89971	5.92261
5.90278	5.9964
5.9035	5.33259
5.9049	6.07129
5.90662	6.43721
5.91293	5.72906
5.91353	5.86286
5.91604	5.5317
5.91882	5.25865
5.91934	5.75463
5.91984	6.36727
5.92059	6.70805
5.92071	5.88933
5.92223	5.76471
5.92276	5.9627
5.9233	5.65896
5.92585	6.30333
5.92679	5.55062
5.92776	6.02204
5.92881	5.38674
5.93077	6.224
5.93216	6.2266
5.9329	6.52549
5.93328	6.50872
5.93387	6.53185
5.93515	5.59381
5.93747	5.25578
5.94451	6.0276
5.94962	6.1762
5.95115	5.29812
5.95188	5.79563
5.95213	5.84339
5.9544	5.73773
5.95507	5.71541
5.95547	5.84465
5.95759	5.57133
5.95765	5.55159
5.95873	6.5884
5.95901	5.90427
5.95972	6.12125
5.95975	5.58552
5.96127	5.70668
5.96155	6.6748
5.96303	6.10315
5.96476	6.22512
5.96502	5.73111
5.96555	4.99867
5.96769	6.16684
5.96785	5.62601
5.96938	6.21929
5.97006	6.3366
5.97011	6.09608
5.97047	5.59001
5.97859	5.56847
5.97912	6.18587
5.98109	5.99061
5.98209	5.80414
5.98247	5.61373
5.98516	5.96406
5.98627	6.06045
5.98658	5.53365
5.9886	5.61449
5.98866	5.87336
5.98964	5.66626
5.98994	6.06199
5.99076	5.85184
5.99297	6.26827
5.9953	5.85575
5.99779	6.06255
5.99972	5.80813
6.00043	5.58019
6.00105	5.78856
6.00618	6.16759
6.00954	5.75531
6.01228	6.18973
6.01318	6.0675
6.01722	5.00586
6.01725	5.6004
6.01852	6.52155
6.0197	6.07604
6.02046	6.67694
6.02101	5.79893
6.02141	5.72397
6.02451	6.02297
6.02536	6.46667
6.02668	5.74126
6.02713	6.10285
6.0273	6.70542
6.03035	5.60652
6.03082	5.76547
6.03237	5.66633
6.03248	5.89195
6.03259	5.94355
6.03362	5.99527
6.03434	5.67688
6.03721	6.18268
6.03826	6.02378
6.04023	5.62753
6.04075	6.3535
6.04172	6.41172
6.04384	5.81181
6.04618	6.04365
6.04813	6.05006
6.04829	5.85822
6.04838	6.03497
6.04862	6.49407
6.04954	6.01505
6.04972	6.16175
6.05077	6.29481
6.05093	6.48051
6.05409	5.56521
6.06131	5.71747
6.06545	5.88604
6.06584	5.724
6.06855	5.86115
6.07003	6.54561
6.07149	6.41659
6.07206	5.72363
6.07248	5.71474
6.07313	6.44878
6.07616	5.38853
6.07791	6.38984
6.07998	6.21065
6.08035	6.2366
6.08275	5.87247
6.08712	5.50851
6.09102	5.94059
6.09261	6.50785
6.09289	6.19142
6.09866	5.86759
6.09867	6.42182
6.09913	6.03489
6.1049	6.05068
6.10501	6.31486
6.10686	6.21805
6.10764	6.08934
6.10794	6.91664
6.10907	6.63624
6.10988	6.18477
6.1118	6.6617
6.11283	6.21373
6.11597	5.92605
6.12184	6.6284
6.12329	5.6912
6.12562	5.82537
6.12684	6.22516
6.12809	6.1577
6.12815	5.99146
6.12953	6.34912
6.13013	5.82229
6.1302	6.2117
6.13024	6.63754
6.13144	5.42561
6.13224	6.03274
6.13284	6.50266
6.13407	5.93256
6.135	6.2703
6.13573	5.76092
6.1366	6.17919
6.13753	6.26554
6.14005	6.65934
6.14385	5.74341
6.14583	5.7969
6.15177	6.71096
6.15263	6.28005
6.15341	6.71229
6.15352	6.60974
6.15398	6.58364
6.15406	5.94968
6.15503	5.92061
6.1565	6.53651
6.15713	6.15724
6.16272	5.89666
6.16306	6.05061
6.16644	6.181
6.17084	6.60467
6.17412	5.90728
6.17432	6.15828
6.17442	6.38934
6.17576	5.9085
6.17704	5.84623
6.1774	6.30346
6.1786	6.44821
6.1786	5.8981
6.17931	5.31223
6.18067	6.14763
6.18257	6.78923
6.18363	6.16808
6.18436	6.13544
6.18552	6.49633
6.18712	6.42769
6.18731	6.43274
6.1878	5.81258
6.18877	6.33392
6.18943	6.3564
6.19359	6.22845
6.19511	5.51336
6.19661	6.59846
6.19823	6.11696
6.19824	6.09195
6.19877	6.72117
6.19888	6.33403
6.19902	6.60768
6.19923	5.57594
6.20267	6.25661
6.20402	5.6099
6.2041	5.83143
6.2045	5.12998
6.20693	6.41778
6.20784	6.20898
6.20794	6.16274
6.20808	5.5371
6.20903	6.06559
6.21035	6.68261
6.21107	6.6191
6.21113	5.77751
6.21364	6.27143
6.21495	6.32205
6.21782	6.65972
6.22017	7.06398
6.22189	5.90786
6.22312	5.9625
6.22408	6.22499
6.22431	6.37716
6.23017	6.23824
6.23525	5.90009
6.23757	6.63062
6.24281	6.2041
6.24469	5.51607
6.24472	6.55891
6.24759	7.02014
6.24887	6.66043
6.25362	6.20975
6.25412	6.32687
6.2564	6.79471
6.25762	6.01736
6.25897	6.73068
6.26807	6.17936
6.27081	6.74091
6.27323	6.30481
6.27675	6.93797
6.28004	6.33111
6.28246	6.03046
6.28355	6.32653
6.28765	6.35756
6.29556	6.4254
6.2959	6.5119
6.29687	6.57768
6.29734	6.15089
6.30456	5.96292
6.30583	6.2878
6.30702	6.28668
6.30876	6.32745
6.31206	6.48205
6.31313	6.43521
6.31376	6.42719
6.31503	6.32386
6.31524	6.13921
6.32092	6.36505
6.32165	6.70937
6.32662	7.16479
6.32687	6.55678
6.32973	5.97304
6.33012	6.60786
6.33093	5.68477
6.33477	5.39745
6.33828	6.66524
6.3395	6.09201
6.34235	6.2932
6.34239	6.40683
6.34336	6.59417
6.34782	6.25232
6.35065	6.02709
6.35083	6.84613
6.35293	6.83563
6.35334	6.77846
6.35433	6.81473
6.35465	6.93704
6.3566	6.35962
6.35845	6.7971
6.35848	6.81489
6.35994	6.30267
6.36394	6.22174
6.37095	6.3686
6.37483	5.84896
6.37782	6.22347
6.38109	6.48412
6.38513	6.17859
6.38563	6.755
6.3861	6.47968
6.3879	6.39922
6.38879	6.04556
6.39116	5.99411
6.39195	6.26614
6.39477	6.48448
6.39524	6.70017
6.40174	6.78641
6.40256	6.54638
6.40264	6.42801
6.40396	6.78034
6.40921	7.04675
6.40985	6.24738
6.41274	6.80127
6.42755	6.60429
6.43029	6.008
6.4303	6.51759
6.43268	7.24953
6.43346	7.0949
6.43393	5.9956
6.44073	6.22452
6.4456	6.9877
6.46203	6.87597
6.47211	5.92661
6.47219	6.46622
6.47302	6.23874
6.4773	6.47068
6.48151	6.84014
6.48496	6.50271
6.48871	7.21662
6.48987	6.18548
6.49704	6.48094
6.49807	6.7844
6.49914	6.77207
6.50175	6.5897
6.50383	6.53568
6.50706	6.27873
6.51063	6.42234
6.51345	7.45109
6.51993	7.00961
6.52097	6.51148
6.52543	6.79525
6.5326	7.15246
6.5336	6.09627
6.53434	6.02821
6.53737	6.04366
6.54052	6.58314
6.54681	6.49157
6.54872	6.54954
6.54914	6.87117
6.55283	6.67324
6.55312	6.82417
6.55362	6.3589
6.55404	6.74396
6.55559	6.56509
6.55795	6.21044
6.56384	6.20817
6.56985	7.01441
6.57164	5.76904
6.58152	6.27619
6.58952	7.2521
6.58958	6.91375
6.58984	6.53604
6.59524	6.76723
6.59532	6.31603
6.59847	6.66492
6.60199	6.49805
6.60321	5.97273
6.60927	6.70266
6.61014	6.44634
6.62135	7.02625
6.6219	6.09457
6.62968	7.17105
6.62979	6.69184
6.6309	6.61342
6.64191	6.6573
6.64401	6.59408
6.64511	7.45663
6.64603	7.20937
6.64703	6.08268
6.65368	6.99896
6.6572	6.6408
6.66933	6.71491
6.67237	6.56453
6.67251	6.29021
6.67829	6.26996
6.68556	7.26468
6.69078	6.43923
6.69412	6.41719
6.69483	6.47835
6.69967	6.7233
6.70289	6.58017
6.70482	6.64566
6.70653	6.19637
6.70995	6.88878
6.72018	6.32881
6.7277	7.02556
6.72933	7.37277
6.73009	6.54664
6.73037	6.73156
6.75842	7.01212
6.75888	7.11577
6.76203	6.20107
6.76374	6.36759
6.76613	6.89492
6.77178	6.60062
6.7876	6.42956
6.7939	7.64469
6.79782	6.72117
6.79887	6.90767
6.80029	6.69351
6.81448	6.58927
6.82923	6.43476
6.83033	6.936
6.83895	7.17541
6.84359	6.91807
6.84444	6.91589
6.84781	6.93994
6.85524	5.89204
6.85999	6.34878
6.86731	6.20667
6.86777	6.75178
6.87569	7.02278
6.87741	7.04379
6.89494	7.55578
6.89959	6.85452
6.9057	6.7617
6.9077	6.64974
6.91019	7.22749
6.91264	7.31187
6.9129	6.97596
6.91361	7.33663
6.91837	6.60503
6.94473	6.86781
6.98817	7.15628
7.00732	6.98997
7.00802	7.85522
7.02093	7.09916
7.02462	7.11468
7.02668	7.2711
7.05095	7.02551
7.05324	6.49905
7.11759	6.58186
7.12079	6.98867
7.12857	6.857
7.13934	7.39436
7.18189	7.84977
7.18322	7.38933
7.20272	6.79619
7.23674	6.68815
7.25739	7.01492
7.42396	7.73519
7.44586	7.04785
7.56988	7.69922

## Sheet: V-plot different populations
Value in the centre of each quantile	Frequancy distribution of values in different samples			Application of the V-plot to different populations for the calculation of overall agreement
	'V-plot' sample	Comparative sample 1 ENTER ↓	Comparative sample 2 ENTER ↓	Calculation of overall agreement (diagnostic accuracy)
2.25	0	0	0	V-plot' sample (as inserted in 'V-plot' sheet)	0.826748
2.75	0	0.012605	0
3.25	0	0.0882353	0
3.75	0.00101317	0.0756303	0	Comparative sample 1	0.953843
4.25	0.0111449	0.10084	0
4.75	0.0688956	0.0714286	0
5.25	0.205674	0.0714286	0	Comparative sample 2	1
5.75	0.33536	0.0840336	0
6.25	0.256332	0.0462185	0
6.75	0.10233	0.130252	0.0514706
7.25	0.0182371	0.10084	0.183824
7.75	0.00101317	0.0840336	0.272059
8.25	0	0.0630252	0.323529
8.75	0	0.0714286	0.132353
9.25	0	0	0.0220588
9.75	0	0	0.0147059
10.25	0	0	0

## Sheet: Raw analysis
Analysis sheet (using data inserted in 'V-plot' sheet)
Agreement for each pair of data				Analysis per Quantile (Q)
Gold stadard +	New test +	Classification agreement (1=yes 0=no)		Q number	Q centre	Q agreement (raw)	Q agreement (corrected for empty quantiles)	Q population (% of total)	Population N
0	0	1		1	2.25	#DIV/0!	1	0	987
0	0	1		2	2.75	#DIV/0!	1	0
0	0	1		3	3.25	#DIV/0!	1	0
0	0	1		4	3.75	1	1	0.00101317
0	0	1		5	4.25	1	1	0.0111449
0	0	1		6	4.75	0.970588	0.970588	0.0688956
0	0	1		7	5.25	0.866995	0.866995	0.205674
0	0	1		8	5.75	0.634441	0.634441	0.33536
0	0	1		9	6.25	0.916996	0.916996	0.256332
0	0	1		10	6.75	1	1	0.10233
0	0	1		11	7.25	1	1	0.0182371
0	0	1		12	7.75	1	1	0.00101317
0	0	1		13	8.25	#DIV/0!	1	0
0	0	1		14	8.75	#DIV/0!	1	0
0	0	1		15	9.25	#DIV/0!	1	0
0	0	1		16	9.75	#DIV/0!	1	0
0	0	1		17	10.25	#DIV/0!	1	0
0	0	1		18	10.75	#DIV/0!	1	0
0	0	1		19	11.25	#DIV/0!	1	0
0	0	1		20	11.75	#DIV/0!	1	0
0	0	1		21	12.25	#DIV/0!	1	0
0	0	1		22	12.75	#DIV/0!	1	0
0	0	1		23	13.25	#DIV/0!	1	0
0	0	1		24	13.75	#DIV/0!	1	0
0	0	1		25	14.25	#DIV/0!	1	0
0	0	1		26	14.75	#DIV/0!	1	0
0	0	1		27	15.25	#DIV/0!	1	0
0	0	1		28	15.75	#DIV/0!	1	0
0	0	1		29	16.25	#DIV/0!	1	0
0	0	1		30	16.75	#DIV/0!	1	0
0	0	1		31	17.25	#DIV/0!	1	0
0	0	1		32	17.75	#DIV/0!	1	0
0	0	1		33	18.25	#DIV/0!	1	0
0	0	1		34	18.75	#DIV/0!	1	0
0	0	1		35	19.25	#DIV/0!	1	0
0	0	1		36	19.75	#DIV/0!	1	0
0	0	1		37	20.25	#DIV/0!	1	0
0	0	1		38	20.75	#DIV/0!	1	0
0	0	1		39	21.25	#DIV/0!	1	0
0	0	1		40	21.75	#DIV/0!	1	0
0	0	1
0	0	1
0	0	1
0	0	1
0	0	1
0	0	1
0	0	1
0	0	1
0	0	1
0	0	1
0	1	0
0	0	1
0	0	1
0	0	1
0	0	1
0	0	1
0	0	1
0	0	1
0	0	1
0	0	1
0	0	1
0	0	1
0	0	1
0	1	0
0	0	1
0	0	1
0	0	1
0	0	1
0	0	1
0	0	1
0	0	1
0	0	1
0	0	1
0	0	1
0	0	1
0	0	1
0	0	1
0	0	1
0	0	1
0	0	1
0	0	1
0	0	1
0	0	1
0	0	1
0	0	1
0	0	1
0	0	1
0	0	1
0	0	1
0	0	1
0	0	1
0	1	0
0	0	1
0	0	1
0	0	1
0	0	1
0	0	1
0	0	1
0	0	1
0	0	1
0	0	1
0	0	1
0	0	1
0	0	1
0	0	1
0	1	0
0	0	1
0	0	1
0	0	1
0	0	1
0	0	1
0	0	1
0	0	1
0	0	1
0	0	1
0	0	1
0	0	1
0	0	1
0	0	1
0	0	1
0	0	1
0	0	1
0	0	1
0	0	1
0	0	1
0	0	1
0	0	1
0	0	1
0	0	1
0	0	1
0	0	1
0	0	1
0	0	1
0	1	0
0	0	1
0	0	1
0	0	1
0	0	1
0	0	1
0	0	1
0	0	1
0	0	1
0	0	1
0	0	1
0	0	1
0	0	1
0	0	1
0	0	1
0	0	1
0	0	1
0	0	1
0	0	1
0	0	1
0	0	1
0	0	1
0	0	1
0	0	1
0	0	1
0	0	1
0	0	1
0	1	0
0	0	1
0	0	1
0	0	1
0	0	1
0	0	1
0	0	1
0	0	1
0	0	1
0	0	1
0	0	1
0	0	1
0	1	0
0	0	1
0	0	1
0	0	1
0	0	1
0	0	1
0	0	1
0	0	1
0	0	1
0	0	1
0	0	1
0	0	1
0	1	0
0	1	0
0	0	1
0	1	0
0	0	1
0	0	1
0	1	0
0	0	1
0	0	1
0	0	1
0	0	1
0	0	1
0	0	1
0	0	1
0	0	1
0	0	1
0	0	1
0	0	1
0	0	1
0	0	1
0	0	1
0	1	0
0	1	0
0	0	1
0	0	1
0	0	1
0	0	1
0	0	1
0	1	0
0	0	1
0	1	0
0	0	1
0	0	1
0	0	1
0	0	1
0	0	1
0	0	1
0	0	1
0	0	1
0	1	0
0	0	1
0	0	1
0	1	0
0	0	1
0	1	0
0	0	1
0	0	1
0	0	1
0	0	1
0	0	1
0	1	0
0	0	1
0	0	1
0	0	1
0	0	1
0	0	1
0	0	1
0	0	1
0	0	1
0	0	1
0	0	1
0	0	1
0	0	1
0	0	1
0	0	1
0	0	1
0	0	1
0	0	1
0	0	1
0	0	1
0	0	1
0	0	1
0	0	1
0	0	1
0	0	1
0	1	0
0	0	1
0	1	0
0	0	1
0	1	0
0	1	0
0	1	0
0	0	1
0	0	1
0	0	1
0	1	0
0	0	1
0	1	0
0	0	1
0	0	1
0	0	1
0	0	1
0	0	1
0	0	1
0	0	1
0	1	0
0	0	1
0	1	0
0	1	0
0	0	1
0	0	1
0	1	0
0	0	1
0	1	0
0	1	0
0	0	1
0	1	0
0	1	0
0	1	0
0	0	1
0	0	1
0	0	1
0	0	1
0	0	1
0	1	0
0	1	0
0	0	1
0	0	1
0	0	1
0	1	0
0	0	1
0	0	1
0	0	1
0	1	0
0	1	0
0	0	1
0	0	1
0	0	1
0	0	1
0	1	0
0	1	0
0	1	0
0	1	0
0	0	1
0	0	1
0	0	1
0	0	1
0	1	0
0	0	1
0	1	0
0	1	0
0	0	1
0	0	1
0	0	1
0	0	1
0	0	1
0	1	0
0	0	1
0	0	1
0	0	1
0	1	0
0	1	0
0	1	0
0	1	0
0	1	0
0	1	0
0	0	1
0	0	1
0	0	1
0	1	0
0	1	0
0	0	1
0	0	1
0	0	1
0	0	1
0	0	1
0	0	1
0	1	0
0	0	1
0	1	0
0	0	1
0	0	1
0	0	1
0	0	1
0	1	0
0	0	1
0	0	1
0	0	1
0	1	0
0	0	1
0	0	1
0	1	0
0	0	1
0	1	0
0	0	1
0	1	0
0	0	1
0	0	1
0	1	0
0	0	1
0	1	0
0	0	1
0	0	1
0	0	1
0	0	1
0	0	1
0	0	1
0	1	0
0	1	0
0	0	1
0	1	0
0	1	0
0	1	0
0	1	0
0	0	1
0	0	1
0	0	1
0	0	1
0	1	0
0	0	1
0	0	1
0	0	1
0	1	0
0	0	1
0	0	1
0	0	1
0	1	0
0	1	0
0	1	0
0	0	1
0	0	1
1	1	1
1	0	0
1	1	1
1	1	1
1	0	0
1	1	1
1	0	0
1	1	1
1	0	0
1	0	0
1	0	0
1	0	0
1	0	0
1	0	0
1	1	1
1	0	0
1	1	1
1	1	1
1	1	1
1	1	1
1	0	0
1	0	0
1	0	0
1	0	0
1	1	1
1	1	1
1	1	1
1	0	0
1	1	1
1	0	0
1	0	0
1	0	0
1	0	0
1	1	1
1	0	0
1	0	0
1	1	1
1	0	0
1	0	0
1	1	1
1	1	1
1	1	1
1	1	1
1	1	1
1	1	1
1	0	0
1	1	1
1	0	0
1	1	1
1	1	1
1	1	1
1	1	1
1	0	0
1	0	0
1	1	1
1	0	0
1	1	1
1	0	0
1	1	1
1	1	1
1	0	0
1	1	1
1	1	1
1	1	1
1	0	0
1	0	0
1	1	1
1	1	1
1	0	0
1	1	1
1	1	1
1	1	1
1	1	1
1	1	1
1	1	1
1	1	1
1	1	1
1	1	1
1	1	1
1	0	0
1	1	1
1	1	1
1	0	0
1	0	0
1	1	1
1	0	0
1	1	1
1	1	1
1	1	1
1	0	0
1	1	1
1	1	1
1	1	1
1	1	1
1	1	1
1	0	0
1	0	0
1	0	0
1	0	0
1	1	1
1	1	1
1	0	0
1	0	0
1	1	1
1	1	1
1	1	1
1	1	1
1	1	1
1	0	0
1	1	1
1	0	0
1	1	1
1	1	1
1	1	1
1	0	0
1	1	1
1	1	1
1	1	1
1	0	0
1	1	1
1	1	1
1	1	1
1	1	1
1	0	0
1	0	0
1	1	1
1	1	1
1	0	0
1	1	1
1	0	0
1	1	1
1	1	1
1	1	1
1	1	1
1	1	1
1	0	0
1	1	1
1	1	1
1	0	0
1	1	1
1	1	1
1	0	0
1	1	1
1	1	1
1	1	1
1	1	1
1	0	0
1	0	0
1	1	1
1	1	1
1	1	1
1	1	1
1	1	1
1	1	1
1	0	0
1	1	1
1	0	0
1	1	1
1	0	0
1	1	1
1	1	1
1	1	1
1	1	1
1	1	1
1	0	0
1	0	0
1	1	1
1	1	1
1	0	0
1	1	1
1	1	1
1	1	1
1	1	1
1	1	1
1	0	0
1	0	0
1	1	1
1	1	1
1	1	1
1	0	0
1	1	1
1	1	1
1	1	1
1	1	1
1	1	1
1	0	0
1	1	1
1	0	0
1	1	1
1	1	1
1	1	1
1	0	0
1	0	0
1	1	1
1	1	1
1	1	1
1	0	0
1	1	1
1	1	1
1	0	0
1	0	0
1	1	1
1	0	0
1	1	1
1	1	1
1	1	1
1	1	1
1	1	1
1	1	1
1	0	0
1	1	1
1	1	1
1	1	1
1	1	1
1	1	1
1	0	0
1	0	0
1	1	1
1	1	1
1	1	1
1	1	1
1	1	1
1	1	1
1	1	1
1	1	1
1	1	1
1	1	1
1	0	0
1	1	1
1	0	0
1	1	1
1	1	1
1	1	1
1	0	0
1	1	1
1	1	1
1	0	0
1	1	1
1	1	1
1	1	1
1	1	1
1	1	1
1	1	1
1	1	1
1	1	1
1	1	1
1	1	1
1	1	1
1	1	1
1	0	0
1	1	1
1	1	1
1	1	1
1	1	1
1	1	1
1	1	1
1	1	1
1	1	1
1	1	1
1	0	0
1	1	1
1	1	1
1	1	1
1	1	1
1	0	0
1	1	1
1	1	1
1	1	1
1	1	1
1	1	1
1	1	1
1	1	1
1	1	1
1	1	1
1	1	1
1	1	1
1	1	1
1	1	1
1	1	1
1	1	1
1	1	1
1	1	1
1	0	0
1	1	1
1	1	1
1	1	1
1	1	1
1	1	1
1	1	1
1	1	1
1	1	1
1	0	0
1	1	1
1	1	1
1	1	1
1	1	1
1	1	1
1	1	1
1	1	1
1	1	1
1	1	1
1	1	1
1	1	1
1	1	1
1	1	1
1	1	1
1	1	1
1	1	1
1	1	1
1	1	1
1	1	1
1	1	1
1	1	1
1	1	1
1	1	1
1	1	1
1	1	1
1	1	1
1	1	1
1	1	1
1	1	1
1	1	1
1	1	1
1	0	0
1	1	1
1	1	1
1	1	1
1	1	1
1	1	1
1	1	1
1	1	1
1	1	1
1	1	1
1	1	1
1	1	1
1	0	0
1	1	1
1	1	1
1	1	1
1	1	1
1	1	1
1	1	1
1	0	0
1	1	1
1	0	0
1	1	1
1	0	0
1	1	1
1	1	1
1	1	1
1	0	0
1	1	1
1	1	1
1	1	1
1	1	1
1	1	1
1	1	1
1	1	1
1	1	1
1	1	1
1	1	1
1	1	1
1	1	1
1	1	1
1	1	1
1	1	1
1	1	1
1	0	0
1	1	1
1	1	1
1	1	1
1	1	1
1	1	1
1	1	1
1	1	1
1	1	1
1	1	1
1	1	1
1	1	1
1	1	1
1	1	1
1	1	1
1	1	1
1	1	1
1	1	1
1	1	1
1	1	1
1	1	1
1	1	1
1	1	1
1	1	1
1	1	1
1	1	1
1	1	1
1	1	1
1	1	1
1	1	1
1	1	1
1	1	1
1	1	1
1	1	1
1	1	1
1	1	1
1	0	0
1	0	0
1	1	1
1	1	1
1	1	1
1	1	1
1	1	1
1	1	1
1	1	1
1	1	1
1	1	1
1	1	1
1	1	1
1	1	1
1	1	1
1	1	1
1	1	1
1	1	1
1	1	1
1	1	1
1	1	1
1	1	1
1	1	1
1	1	1
1	1	1
1	1	1
1	1	1
1	1	1
1	1	1
1	1	1
1	1	1
1	1	1
1	1	1
1	1	1
1	1	1
1	1	1
1	1	1
1	1	1
1	1	1
1	1	1
1	1	1
1	1	1
1	1	1
1	1	1
1	1	1
1	1	1
1	1	1
1	1	1
1	1	1
1	1	1
1	1	1
1	1	1
1	1	1
1	1	1
1	1	1
1	1	1
1	1	1
1	1	1
1	1	1
1	1	1
1	1	1
1	1	1
1	1	1
1	1	1
1	1	1
1	1	1
1	1	1
1	1	1
1	1	1
1	1	1
1	1	1
1	1	1
1	1	1
1	1	1
1	1	1
1	1	1
1	1	1
1	1	1
1	1	1
1	1	1
1	1	1
1	1	1
1	1	1
1	1	1
1	1	1
1	1	1
1	1	1
1	1	1
1	1	1
1	1	1
1	1	1
1	1	1
1	1	1
1	1	1
1	1	1
1	1	1
1	1	1
1	1	1
1	1	1
1	1	1
1	1	1
1	1	1
1	1	1
1	1	1
1	1	1
1	1	1
1	1	1
1	1	1
1	1	1
1	1	1
1	1	1
1	1	1
1	1	1
1	1	1
1	1	1
1	1	1
1	1	1
1	1	1
1	1	1
1	1	1
1	1	1
1	1	1
1	1	1
1	1	1
1	1	1
1	1	1
1	1	1
1	1	1
1	1	1
1	1	1
1	1	1
1	1	1
1	1	1
1	1	1
1	1	1
1	1	1
1	1	1
1	1	1
1	1	1
1	1	1
1	1	1
1	1	1
1	1	1
1	1	1
1	1	1
1	1	1
1	1	1
1	1	1
1	1	1
1	1	1
1	1	1
1	1	1
1	1	1
1	1	1
1	1	1
1	1	1
1	1	1
1	1	1
1	1	1
1	1	1
1	1	1
1	1	1
1	1	1
1	1	1
1	1	1
1	1	1
1	1	1
1	1	1
1	1	1
1	1	1
1	1	1
1	1	1
1	1	1
1	1	1
1	1	1
1	1	1
1	1	1
1	1	1
1	1	1
0	0	1
0	0	1
0	0	1
0	0	1
0	0	1
0	0	1
0	0	1
0	0	1
0	0	1
0	0	1
0	0	1
0	0	1
0	0	1
0	0	1
0	0	1
0	0	1
0	0	1
0	0	1
0	0	1
0	0	1
0	0	1
0	0	1
0	0	1
0	0	1
0	0	1
0	0	1
0	0	1
0	0	1
0	0	1
0	0	1
0	0	1
0	0	1
0	0	1
0	0	1
0	0	1
0	0	1
0	0	1
0	0	1
0	0	1
0	0	1
0	0	1
0	0	1
0	0	1
0	0	1
0	0	1
0	0	1
0	0	1
0	0	1
0	0	1
0	0	1
0	0	1
0	0	1
0	0	1
0	0	1
0	0	1
0	0	1
0	0	1
0	0	1
0	0	1
0	0	1
0	0	1
0	0	1
0	0	1
0	0	1
0	0	1
0	0	1
0	0	1
0	0	1
0	0	1
0	0	1
0	0	1
0	0	1
0	0	1
0	0	1
0	0	1
0	0	1
0	0	1
0	0	1
0	0	1
0	0	1
0	0	1
0	0	1
0	0	1
0	0	1
0	0	1
0	0	1
0	0	1
0	0	1
0	0	1
0	0	1
0	0	1
0	0	1
0	0	1
0	0	1
0	0	1
0	0	1
0	0	1
0	0	1
0	0	1
0	0	1
0	0	1
0	0	1
0	0	1
0	0	1
0	0	1
0	0	1
0	0	1
0	0	1
0	0	1
0	0	1
0	0	1
0	0	1
0	0	1
0	0	1
0	0	1
0	0	1
0	0	1
0	0	1
0	0	1
0	0	1
0	0	1
0	0	1
0	0	1
0	0	1
0	0	1
0	0	1
0	0	1
0	0	1
0	0	1
0	0	1
0	0	1
0	0	1
0	0	1
0	0	1
0	0	1
0	0	1
0	0	1
0	0	1
0	0	1
0	0	1
0	0	1
0	0	1
0	0	1
0	0	1
0	0	1
0	0	1
0	0	1
0	0	1
0	0	1
0	0	1
0	0	1
0	0	1
0	0	1
0	0	1
0	0	1
0	0	1
0	0	1
0	0	1
0	0	1
0	0	1
0	0	1
0	0	1
0	0	1
0	0	1
0	0	1
0	0	1
0	0	1
0	0	1
0	0	1
0	0	1
0	0	1
0	0	1
0	0	1
0	0	1
0	0	1
0	0	1
0	0	1
0	0	1
0	0	1
0	0	1
0	0	1
0	0	1
0	0	1
0	0	1
0	0	1
0	0	1
0	0	1
0	0	1
0	0	1
0	0	1
0	0	1
0	0	1
0	0	1
0	0	1
0	0	1
0	0	1
0	0	1
0	0	1
0	0	1
0	0	1
0	0	1
0	0	1
0	0	1
0	0	1
0	0	1
0	0	1
0	0	1
0	0	1
0	0	1
0	0	1
0	0	1
0	0	1
0	0	1
0	0	1
0	0	1
0	0	1
0	0	1
0	0	1
0	0	1
0	0	1
0	0	1
0	0	1
0	0	1
0	0	1
0	0	1
0	0	1
0	0	1
0	0	1
0	0	1
0	0	1
0	0	1
0	0	1
0	0	1
0	0	1
0	0	1
0	0	1
0	0	1
0	0	1
0	0	1
0	0	1
0	0	1
0	0	1
0	0	1
0	0	1
0	0	1
0	0	1
0	0	1
0	0	1
0	0	1
0	0	1
0	0	1
0	0	1
0	0	1
0	0	1
0	0	1
0	0	1
0	0	1
0	0	1
0	0	1
0	0	1
0	0	1
0	0	1
0	0	1
0	0	1
0	0	1
0	0	1
0	0	1
0	0	1
0	0	1
0	0	1
0	0	1
0	0	1
0	0	1
0	0	1
0	0	1
0	0	1
0	0	1
0	0	1
0	0	1
0	0	1
0	0	1
0	0	1
0	0	1
0	0	1
0	0	1
0	0	1
0	0	1
0	0	1
0	0	1
0	0	1
0	0	1
0	0	1
0	0	1
0	0	1
0	0	1
0	0	1
0	0	1
0	0	1
0	0	1
0	0	1
0	0	1
0	0	1
0	0	1
0	0	1
0	0	1
0	0	1
0	0	1
0	0	1
0	0	1
0	0	1
0	0	1
0	0	1
0	0	1
0	0	1
0	0	1
0	0	1
0	0	1
0	0	1
0	0	1
0	0	1
0	0	1
0	0	1
0	0	1
0	0	1
0	0	1
0	0	1
0	0	1
0	0	1
0	0	1
0	0	1
0	0	1
0	0	1
0	0	1
0	0	1
0	0	1
0	0	1
0	0	1
0	0	1
0	0	1
0	0	1
0	0	1
0	0	1
0	0	1
0	0	1
0	0	1
0	0	1
0	0	1
0	0	1
0	0	1
0	0	1
0	0	1
0	0	1
0	0	1
0	0	1
0	0	1
0	0	1
0	0	1
0	0	1
0	0	1
0	0	1
0	0	1
0	0	1
0	0	1
0	0	1
0	0	1
0	0	1
0	0	1
0	0	1
0	0	1
0	0	1
0	0	1
0	0	1
0	0	1
0	0	1
0	0	1
0	0	1
0	0	1
0	0	1
0	0	1
0	0	1
0	0	1
0	0	1
0	0	1
0	0	1
0	0	1
0	0	1
0	0	1
0	0	1
0	0	1
0	0	1
0	0	1
0	0	1
0	0	1
0	0	1
0	0	1
0	0	1
0	0	1
0	0	1
0	0	1
0	0	1
0	0	1
0	0	1
0	0	1
0	0	1
0	0	1
0	0	1
0	0	1
0	0	1
0	0	1
0	0	1
0	0	1
0	0	1
0	0	1
0	0	1
0	0	1
0	0	1
0	0	1
0	0	1
0	0	1
0	0	1
0	0	1
0	0	1
0	0	1
0	0	1
0	0	1
0	0	1
0	0	1
0	0	1
0	0	1
0	0	1
0	0	1
0	0	1
0	0	1
0	0	1
0	0	1
0	0	1
0	0	1
0	0	1
0	0	1
0	0	1
0	0	1
0	0	1
0	0	1
0	0	1
0	0	1
0	0	1
0	0	1
0	0	1
0	0	1
0	0	1
0	0	1
0	0	1
0	0	1
0	0	1
0	0	1
0	0	1
0	0	1
0	0	1
0	0	1
0	0	1
0	0	1
0	0	1
0	0	1
0	0	1
0	0	1
0	0	1
0	0	1
0	0	1
0	0	1
0	0	1
0	0	1
0	0	1
0	0	1
0	0	1
0	0	1
0	0	1
0	0	1
0	0	1
0	0	1
0	0	1
0	0	1
0	0	1
0	0	1
0	0	1
0	0	1
0	0	1
0	0	1
0	0	1
0	0	1
0	0	1
0	0	1
0	0	1
0	0	1
0	0	1
0	0	1
0	0	1
0	0	1
0	0	1
0	0	1
0	0	1
0	0	1
0	0	1
0	0	1
0	0	1
0	0	1
0	0	1
0	0	1
0	0	1
0	0	1
0	0	1
0	0	1
0	0	1
0	0	1
0	0	1
0	0	1
0	0	1
0	0	1
0	0	1
0	0	1
0	0	1
0	0	1
0	0	1
0	0	1
0	0	1
0	0	1
0	0	1
0	0	1
0	0	1
0	0	1
0	0	1
0	0	1
0	0	1
0	0	1
0	0	1
0	0	1
0	0	1
0	0	1
0	0	1
0	0	1
0	0	1
0	0	1
0	0	1
0	0	1
0	0	1
0	0	1
0	0	1
0	0	1
0	0	1
0	0	1
0	0	1
0	0	1
0	0	1
0	0	1
0	0	1
0	0	1
0	0	1
0	0	1
0	0	1
0	0	1
0	0	1
0	0	1
0	0	1
0	0	1
0	0	1
0	0	1
0	0	1
0	0	1
0	0	1
0	0	1
0	0	1
0	0	1
0	0	1
0	0	1
0	0	1
0	0	1
0	0	1
0	0	1
0	0	1
0	0	1
0	0	1
0	0	1
0	0	1
0	0	1
0	0	1
0	0	1
0	0	1
0	0	1
0	0	1
0	0	1
0	0	1
0	0	1
0	0	1
0	0	1
0	0	1
0	0	1
0	0	1
0	0	1
0	0	1
0	0	1
0	0	1
0	0	1
0	0	1
0	0	1
0	0	1
0	0	1
0	0	1
0	0	1
0	0	1
0	0	1
0	0	1
0	0	1
0	0	1
0	0	1
0	0	1
0	0	1
0	0	1
0	0	1
0	0	1
0	0	1
0	0	1
0	0	1
0	0	1
0	0	1
0	0	1
0	0	1
0	0	1
0	0	1
0	0	1
0	0	1
0	0	1
0	0	1
0	0	1
0	0	1
0	0	1
0	0	1
0	0	1
0	0	1
0	0	1
0	0	1
0	0	1
0	0	1
0	0	1
0	0	1
0	0	1
0	0	1
0	0	1
0	0	1
0	0	1
0	0	1
0	0	1
0	0	1
0	0	1
0	0	1
0	0	1
0	0	1
0	0	1
0	0	1
0	0	1
0	0	1
0	0	1
0	0	1
0	0	1
0	0	1
0	0	1
0	0	1
0	0	1
0	0	1
0	0	1
0	0	1
0	0	1
0	0	1
0	0	1
0	0	1
0	0	1
0	0	1
0	0	1
0	0	1
0	0	1
0	0	1
0	0	1
0	0	1
0	0	1
0	0	1
0	0	1
0	0	1
0	0	1
0	0	1
0	0	1
0	0	1
0	0	1
0	0	1
0	0	1
0	0	1
0	0	1
0	0	1
0	0	1
0	0	1
0	0	1
0	0	1
0	0	1
0	0	1
0	0	1
0	0	1
0	0	1
0	0	1
0	0	1
0	0	1
0	0	1
0	0	1
0	0	1
0	0	1
0	0	1
0	0	1
0	0	1
0	0	1
0	0	1
0	0	1
0	0	1
0	0	1
0	0	1
0	0	1
0	0	1
0	0	1
0	0	1
0	0	1
0	0	1
0	0	1
0	0	1
0	0	1
0	0	1
0	0	1
0	0	1
0	0	1
0	0	1
0	0	1
0	0	1
0	0	1
0	0	1
0	0	1
0	0	1
0	0	1
0	0	1
0	0	1
0	0	1
0	0	1
0	0	1
0	0	1
0	0	1
0	0	1
0	0	1
0	0	1
0	0	1
0	0	1
0	0	1
0	0	1
0	0	1
0	0	1
0	0	1
0	0	1
0	0	1
0	0	1
0	0	1
0	0	1
0	0	1
0	0	1
0	0	1
0	0	1
0	0	1
0	0	1
0	0	1
0	0	1
0	0	1
0	0	1
0	0	1
0	0	1
0	0	1
0	0	1
0	0	1
0	0	1
0	0	1
0	0	1
0	0	1
0	0	1
0	0	1
0	0	1
0	0	1
0	0	1
0	0	1
0	0	1
0	0	1
0	0	1
0	0	1
0	0	1
0	0	1
0	0	1
0	0	1
0	0	1
0	0	1
0	0	1
0	0	1
0	0	1
0	0	1
0	0	1
0	0	1
0	0	1
0	0	1
0	0	1
0	0	1
0	0	1
0	0	1
0	0	1
0	0	1
0	0	1
0	0	1
0	0	1
0	0	1
0	0	1
0	0	1
0	0	1
0	0	1
0	0	1
0	0	1
0	0	1
0	0	1
0	0	1
0	0	1
0	0	1
0	0	1
0	0	1
0	0	1
0	0	1
0	0	1
0	0	1
0	0	1
0	0	1
0	0	1
0	0	1
0	0	1
0	0	1
0	0	1
0	0	1
0	0	1
0	0	1
0	0	1
0	0	1
0	0	1
0	0	1
0	0	1
0	0	1
0	0	1
0	0	1
0	0	1
0	0	1
0	0	1
0	0	1
0	0	1
0	0	1
0	0	1
0	0	1
0	0	1
0	0	1
0	0	1
0	0	1
0	0	1
0	0	1
0	0	1
0	0	1
0	0	1
0	0	1
0	0	1
0	0	1
0	0	1
0	0	1
0	0	1
0	0	1
0	0	1
0	0	1
0	0	1
0	0	1
0	0	1
0	0	1
0	0	1
0	0	1
0	0	1
0	0	1
0	0	1
0	0	1
0	0	1
0	0	1
0	0	1
0	0	1
0	0	1
0	0	1
0	0	1
0	0	1
0	0	1
0	0	1
0	0	1
0	0	1
0	0	1
0	0	1
0	0	1
0	0	1
0	0	1
0	0	1
0	0	1
0	0	1
0	0	1
0	0	1
0	0	1
0	0	1
0	0	1
0	0	1
0	0	1
0	0	1
0	0	1
0	0	1
0	0	1
0	0	1
0	0	1
0	0	1
0	0	1
0	0	1
0	0	1
0	0	1
0	0	1
0	0	1
0	0	1
0	0	1
0	0	1
0	0	1
0	0	1
0	0	1
0	0	1
0	0	1
0	0	1
0	0	1
0	0	1
0	0	1
0	0	1
0	0	1
0	0	1
0	0	1
0	0	1
0	0	1
0	0	1
0	0	1
0	0	1
0	0	1
0	0	1
0	0	1
0	0	1
0	0	1
0	0	1
0	0	1
0	0	1
0	0	1
0	0	1
0	0	1
0	0	1
0	0	1
0	0	1
0	0	1
0	0	1
0	0	1
0	0	1
0	0	1
0	0	1
0	0	1
0	0	1
0	0	1
0	0	1
0	0	1
0	0	1
0	0	1
0	0	1
0	0	1
0	0	1
0	0	1
0	0	1
0	0	1
0	0	1
0	0	1
0	0	1
0	0	1
0	0	1
0	0	1
0	0	1
0	0	1
0	0	1
0	0	1
0	0	1
0	0	1
0	0	1
0	0	1
0	0	1
0	0	1
0	0	1
0	0	1
0	0	1
0	0	1
0	0	1
0	0	1
0	0	1
0	0	1
0	0	1
0	0	1
0	0	1
0	0	1
0	0	1
[truncated: 3,000 more rows]
